# Supplementary material for: Generation and validation of a novel multitarget small molecule in glioblastoma
Source: Springer Nature journal article supplement (doi:10.1038/s41419-025-07569-1), 2025-04-04
Supplement: MOESM1 [file 41419_2025_7569_MOESM1_ESM.pdf]

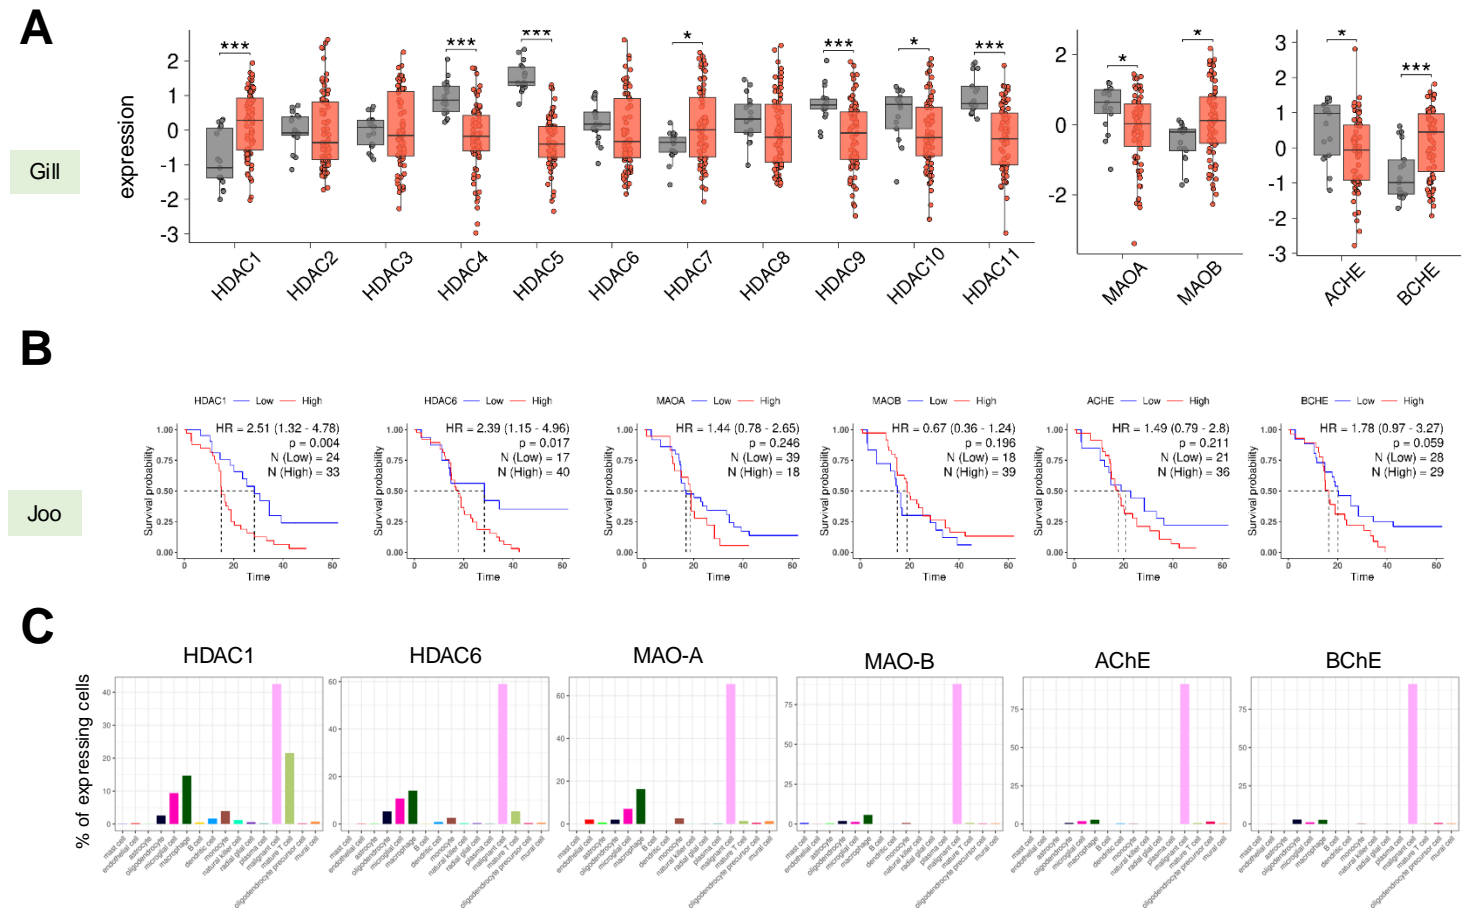

**Suppl. Fig. 1. A)** Expression of target genes in normal tissue (grey) versus glioblastoma samples (red) in Gill cohort. **B)** Kaplan-Meier survival curves of patients with low vs highEx expression of target genes in Joo cohort. **C)** Expression and percentage of expressing cells of target genes in cell types from single-cell RNAseq of glioblastoma samples.

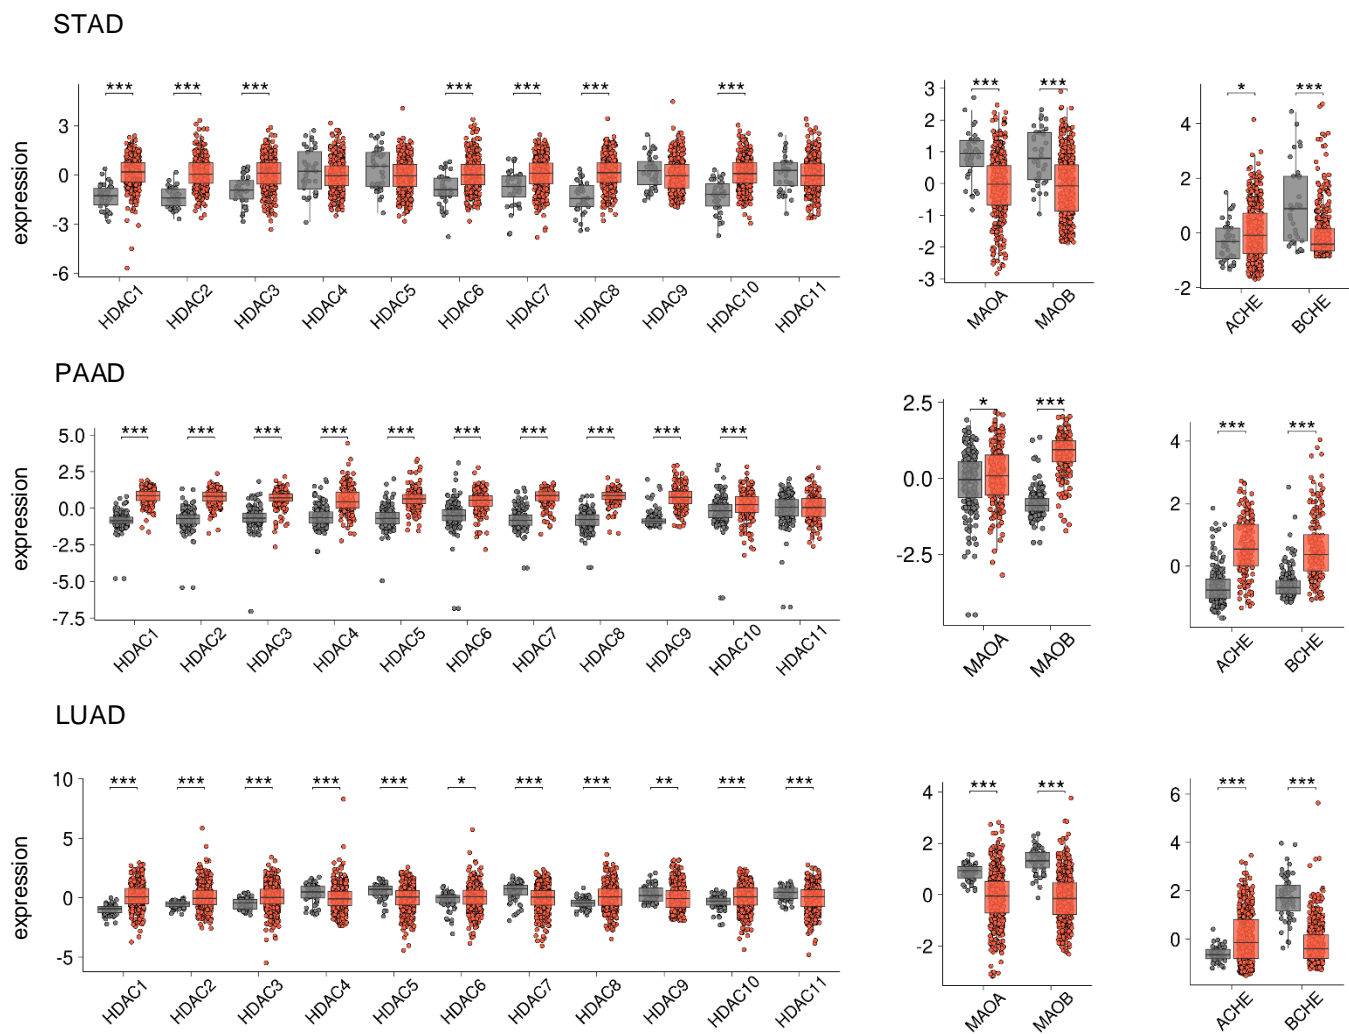

**Suppl. Fig. 2.** Expression of target genes in normal tissue (grey) versus cancer samples (red) in gastric (STAD), pancreatic (PAAD) and lung (LUAD) cancer in TCGA cohort.

A

IR spectrum

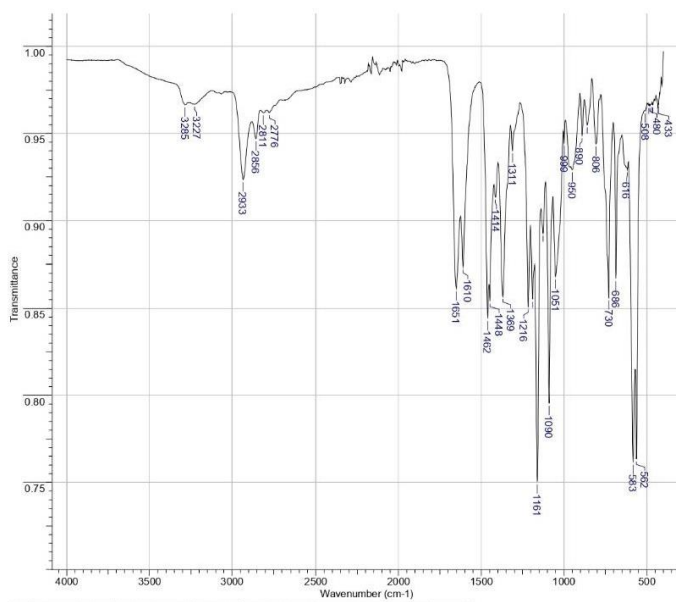

B

 $^1\text{H}$  NMR (100  $^\circ\text{C}$ ) spectrum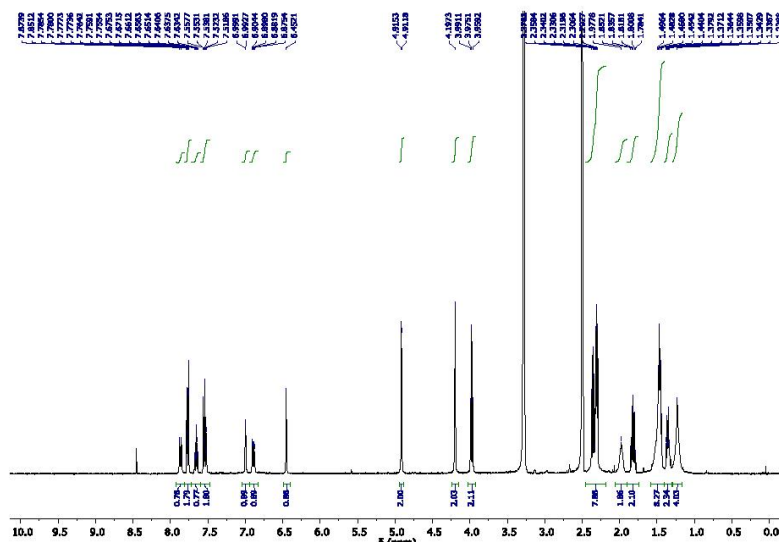

C

 $^{13}\text{C}$  NMR spectrum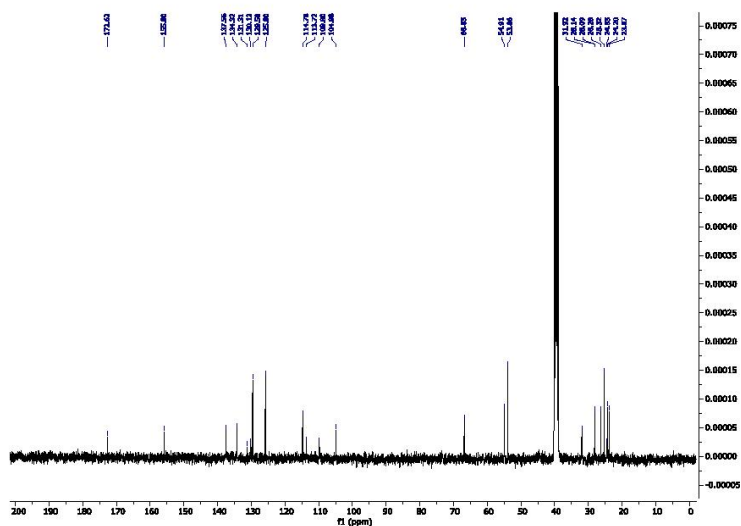

D

HRMS spectrum

Compound Table

| Compound Label            | RT    | Mass     | Abund   | Formula     | Tgt Mass | Diff (ppm) | Hits (DB) |
|---------------------------|-------|----------|---------|-------------|----------|------------|-----------|
| Cpd 1: C34H44N4O6S; 2.129 | 2.129 | 636.2974 | 1934371 | C34H44N4O6S | 636.2982 | -1.12      | 1         |

| Compound Label            | m/z      | RT    | Algorithm       | Mass     |
|---------------------------|----------|-------|-----------------|----------|
| Cpd 1: C34H44N4O6S; 2.129 | 637.3045 | 2.129 | Find by Formula | 636.2974 |

MS Zoomed Spectrum

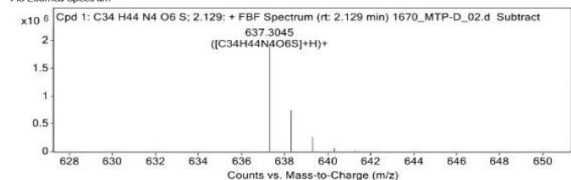

MS Spectrum Peak List

| m/z      | z | Abund      | Formula     | Ion    |
|----------|---|------------|-------------|--------|
| 637.3045 | 1 | 1934370.88 | C34H44N4O6S | (M+H)+ |
| 638.3082 | 1 | 744057.25  | C34H44N4O6S | (M+H)+ |
| 639.3074 | 1 | 259578.28  | C34H44N4O6S | (M+H)+ |
| 640.3084 | 1 | 60391.55   | C34H44N4O6S | (M+H)+ |
| 641.3108 | 1 | 11383.89   | C34H44N4O6S | (M+H)+ |

MS Zoomed Spectrum

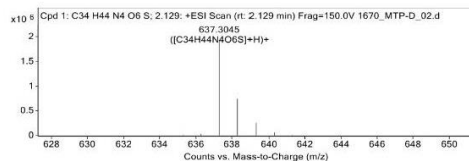

| m/z      | Calc m/z | Diff(ppm) | z | Abund      | Formula     | Ion    |
|----------|----------|-----------|---|------------|-------------|--------|
| 637.3045 | 637.3054 | 1.4       | 1 | 1934370.88 | C34H44N4O6S | (M+H)+ |
| 638.3082 | 638.3085 | -0.53     | 1 | 744057.25  | C34H44N4O6S | (M+H)+ |
| 639.3074 | 639.308  | -0.85     | 1 | 259578.28  | C34H44N4O6S | (M+H)+ |
| 640.3084 | 640.3088 | -0.61     | 1 | 60391.55   | C34H44N4O6S | (M+H)+ |
| 641.3108 | 641.3102 | 0.94      | 1 | 11383.89   | C34H44N4O6S | (M+H)+ |

**Suppl. Fig. 3. Structure of DDI199 molecule based on spectroscopic and analytical data.** Analysis with **A)** Infrared spectroscopy (IR), **B)** Proton nuclear magnetic resonance ( $^1\text{H}$  NMR), **C)** Carbon-13 nuclear magnetic resonance ( $^{13}\text{C}$  NMR), and **D)** High resolution mass spectrometry (HRMS).

# HPLC-MS

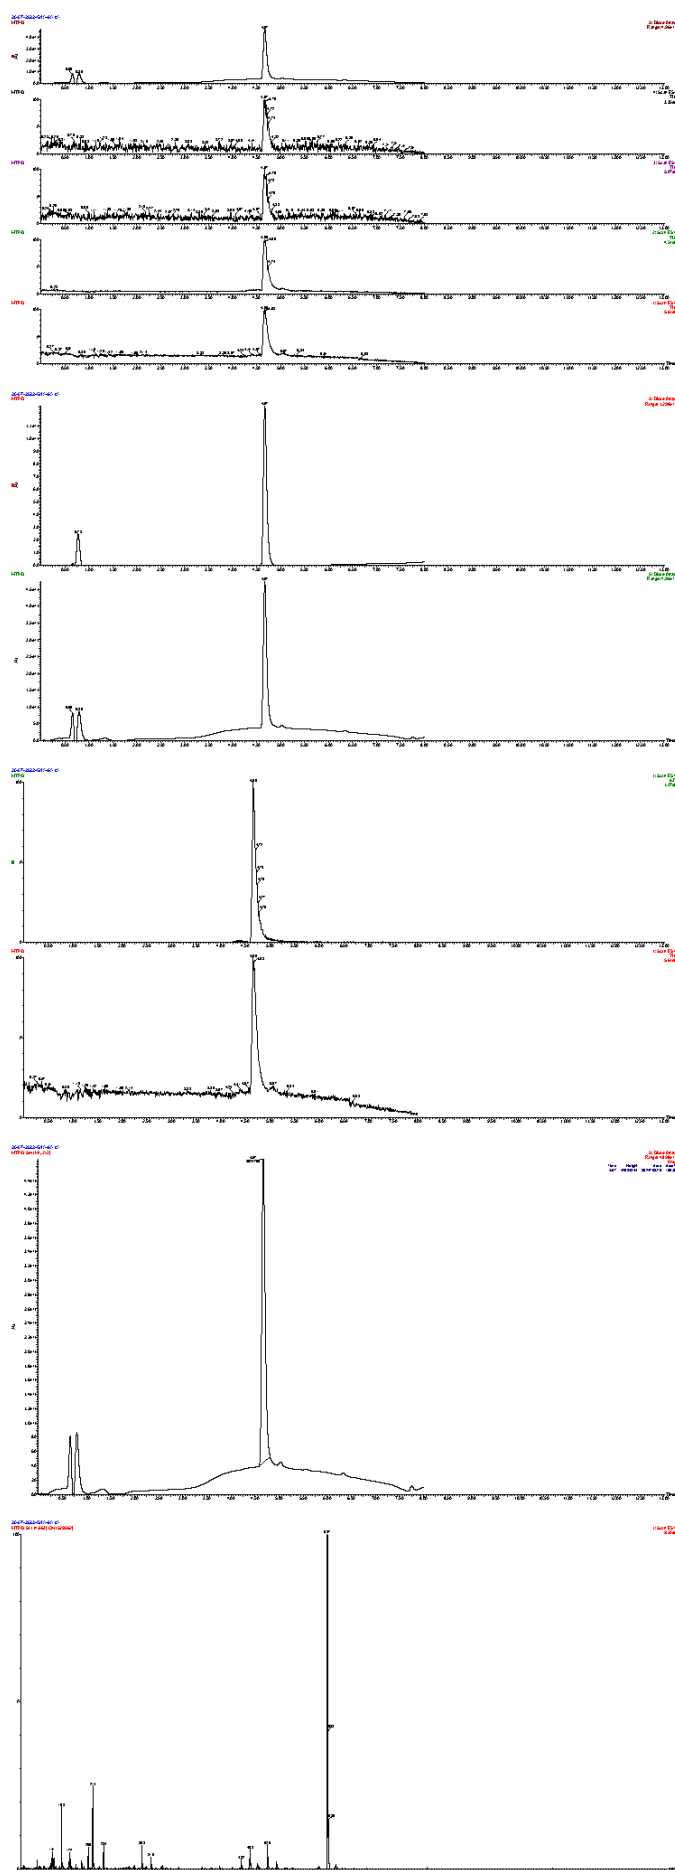

Suppl. Fig. 4. Purity of DDI199. Analysis with High-performance liquid chromatograph with mass spectrometry (HPLC-MS).

**A**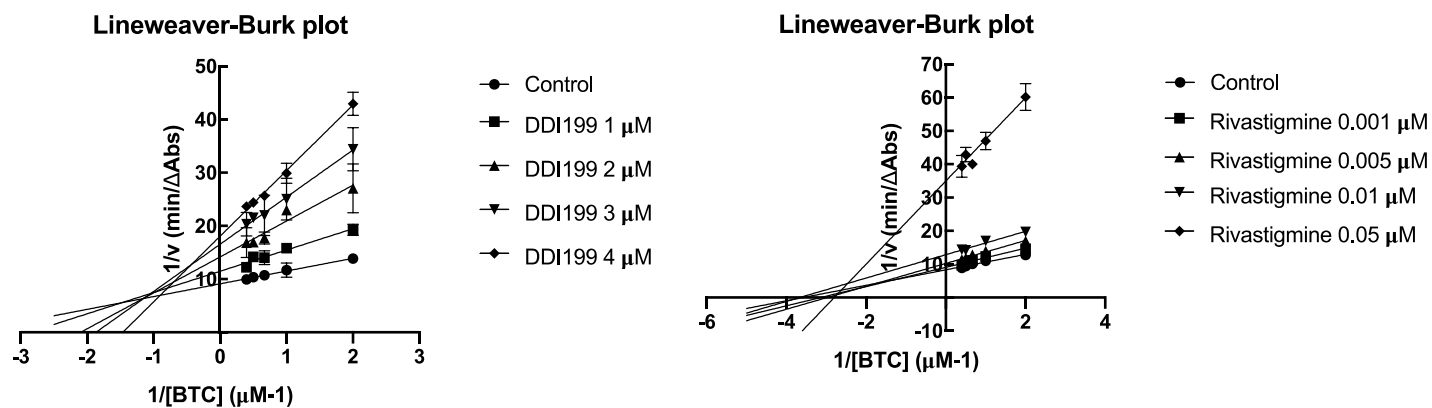**B**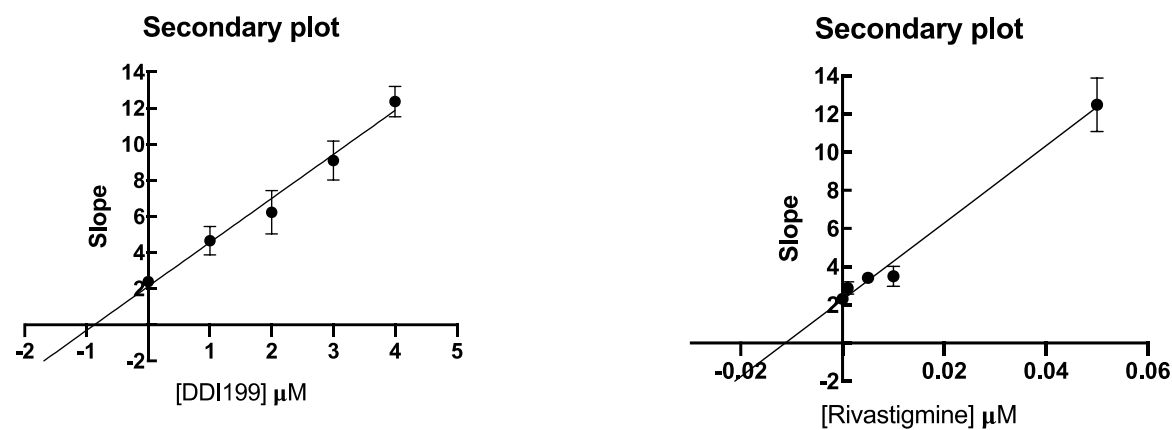

**Suppl. Fig. 5 A)** Lineweaver-Burk plot representing reciprocal of BChE velocity versus reciprocal of different substrate concentrations at different concentrations of DDI199 or Rivastigmine. **B)** Secondary plot of slopes obtained in Lineweaver-Burk plot versus different inhibitor concentrations for the estimation of  $K_i$  for DDI199 and Rivastigmine.

A

RNAseq

B

Proteomics

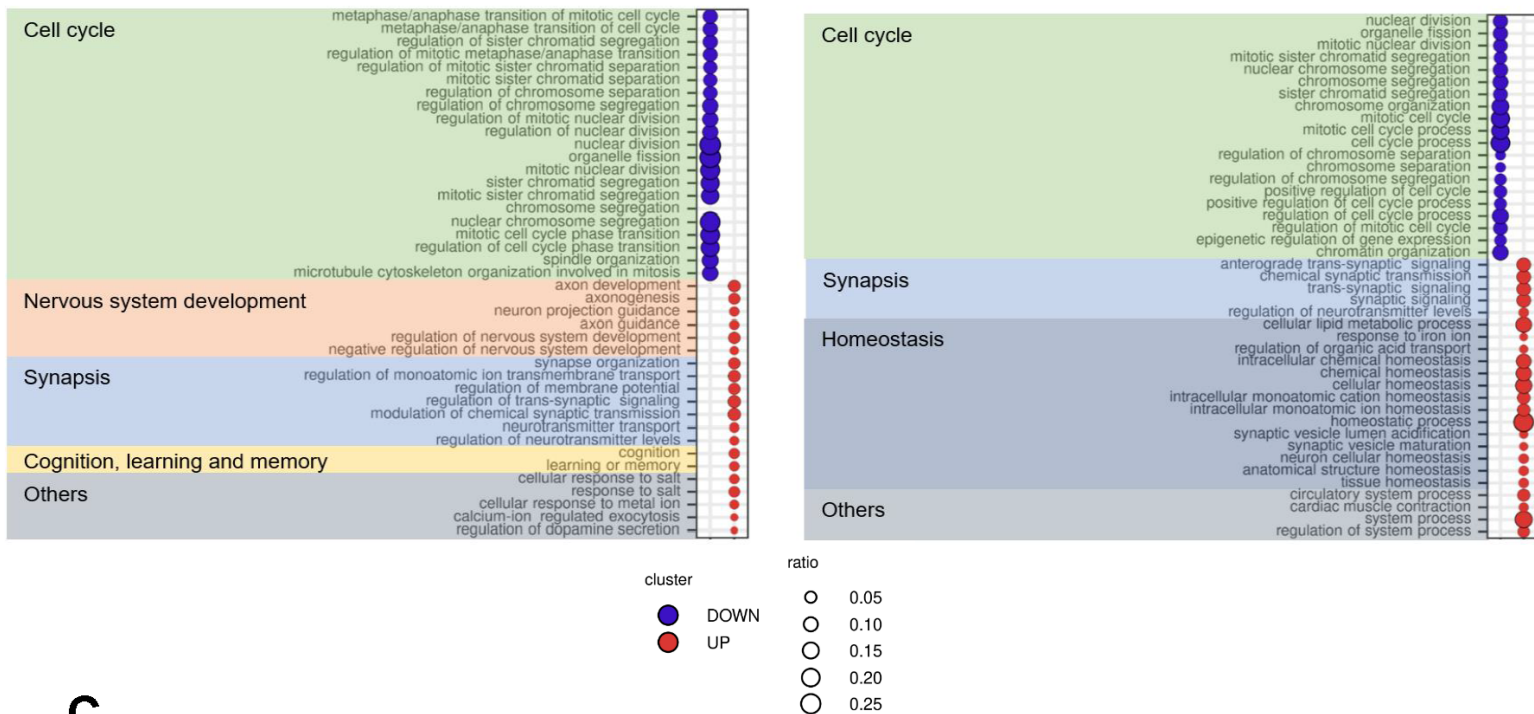

C

| Cell cycle |                                                   | DNA remodeling |                                          | Synapsis |                                              |
|------------|---------------------------------------------------|----------------|------------------------------------------|----------|----------------------------------------------|
| 1          | ATP hydrolysis activity                           | 1              | cadherin binding                         | 1        | neuron to neuron synapse                     |
| 2          | cell cycle G2/M phase transition                  | 2              | nucleosome organization                  | 2        | glutamatergic synapse                        |
| 3          | mitotic cytokinesis                               | 3              | nucleosome assembly                      | 3        | postsynaptic specialization                  |
| 4          | microtubule motor activity                        | 4              | protein-DNA complex assembly             | 4        | neurotransmitter transport                   |
| 5          | midbody                                           | 5              | nucleosome                               | 5        | synaptic membrane                            |
| 6          | microtubule binding                               | 6              | protein-DNA complex organization         | 6        | modulation of chemical synaptic transmission |
| 7          | chromosome localization                           | 7              | epigenetic regulation of gene expression | 7        | regulation of trans-synaptic signaling       |
| 8          | regulation of cell cycle phase transition         | 8              | chromatin remodeling                     | 8        | synapse organization                         |
| 9          | chromosome, centromeric region                    | 9              | SWI/SNF superfamily-type complex         | 9        | cognition                                    |
| 10         | mitotic nuclear division                          |                |                                          | 10       | regulation of nervous system development     |
| 11         | meiotic chromosome segregation                    |                |                                          | 11       | axon development                             |
| 12         | non-membrane-bounded organelle assembly           |                |                                          |          |                                              |
| 13         | negative regulation of chromosome organization    |                |                                          |          |                                              |
| 14         | spindle organization                              |                |                                          |          |                                              |
| 15         | spindle assembly checkpoint signaling             |                |                                          |          |                                              |
| 16         | nuclear division                                  |                |                                          |          |                                              |
| 17         | mitotic spindle checkpoint signaling              |                |                                          |          |                                              |
| 18         | spindle                                           |                |                                          |          |                                              |
| 19         | regulation of mitotic nuclear division            |                |                                          |          |                                              |
| 20         | regulation of nuclear division                    |                |                                          |          |                                              |
| 21         | chromosome segregation                            |                |                                          |          |                                              |
| 22         | nuclear chromosome segregation                    |                |                                          |          |                                              |
| 23         | regulation of chromosome segregation              |                |                                          |          |                                              |
| 24         | regulation of chromosome separation               |                |                                          |          |                                              |
| 25         | sister chromatid segregation                      |                |                                          |          |                                              |
| 26         | regulation of chromosome organization             |                |                                          |          |                                              |
| 27         | mitotic cell cycle phase transition               |                |                                          |          |                                              |
| 28         | condensed chromosome                              |                |                                          |          |                                              |
| 29         | regulation of mitotic cell cycle phase transition |                |                                          |          |                                              |
| 30         | kinetochore organization                          |                |                                          |          |                                              |
| 31         | chromosome condensation                           |                |                                          |          |                                              |
| 32         | nuclear chromosome                                |                |                                          |          |                                              |
| 33         | centromere complex assembly                       |                |                                          |          |                                              |

  

| Vesicle |                                                                                  | Transport |                                                      |
|---------|----------------------------------------------------------------------------------|-----------|------------------------------------------------------|
| 1       | extrinsic component of synaptic vesicle membrane                                 | 1         | regulation of membrane potential                     |
| 2       | ATPase-coupled ion transmembrane transporter activity                            | 2         | transporter complex                                  |
| 3       | diphosphate hydrolysis-driven proton transmembrane transporter activity          | 3         | regulation of monoatomic ion transmembrane transport |
| 4       | proton-transporting V-type ATPase, V1 domain                                     | 4         | monoatomic ion channel complex                       |
| 5       | synaptic vesicle maturation                                                      | 5         | voltage-gated monoatomic ion channel activity        |
| 6       | neuron cellular homeostasis                                                      | 6         | metal ion transmembrane transporter activity         |
| 7       | vacuolar proton-transporting V-type ATPase, V1 domain                            | 7         | monoatomic ion gated channel activity                |
| 8       | proton-transporting ATPase activity, rotational mechanism                        | 8         | monoatomic ion channel activity                      |
| 9       | clathrin-coated vesicle membrane                                                 | 9         | gated channel activity                               |
| 10      | synaptic vesicle lumen acidification                                             | 10        | voltage-gated channel activity                       |
| 11      | clathrin-coated vesicle                                                          |           |                                                      |
| 12      | ATPase activity, coupled to transmembrane movement of ions, rotational mechanism |           |                                                      |
| 13      | macroautophagy                                                                   |           |                                                      |

**Suppl. Fig. 6 A-B)** Gene ontology study of RNAseq and proteomics representing the 20 most correlated pathways with upregulated and downregulated DEGs. **C)** List of ontologies conforming each of the clusters from the combined study of RNAseq and proteomic results.

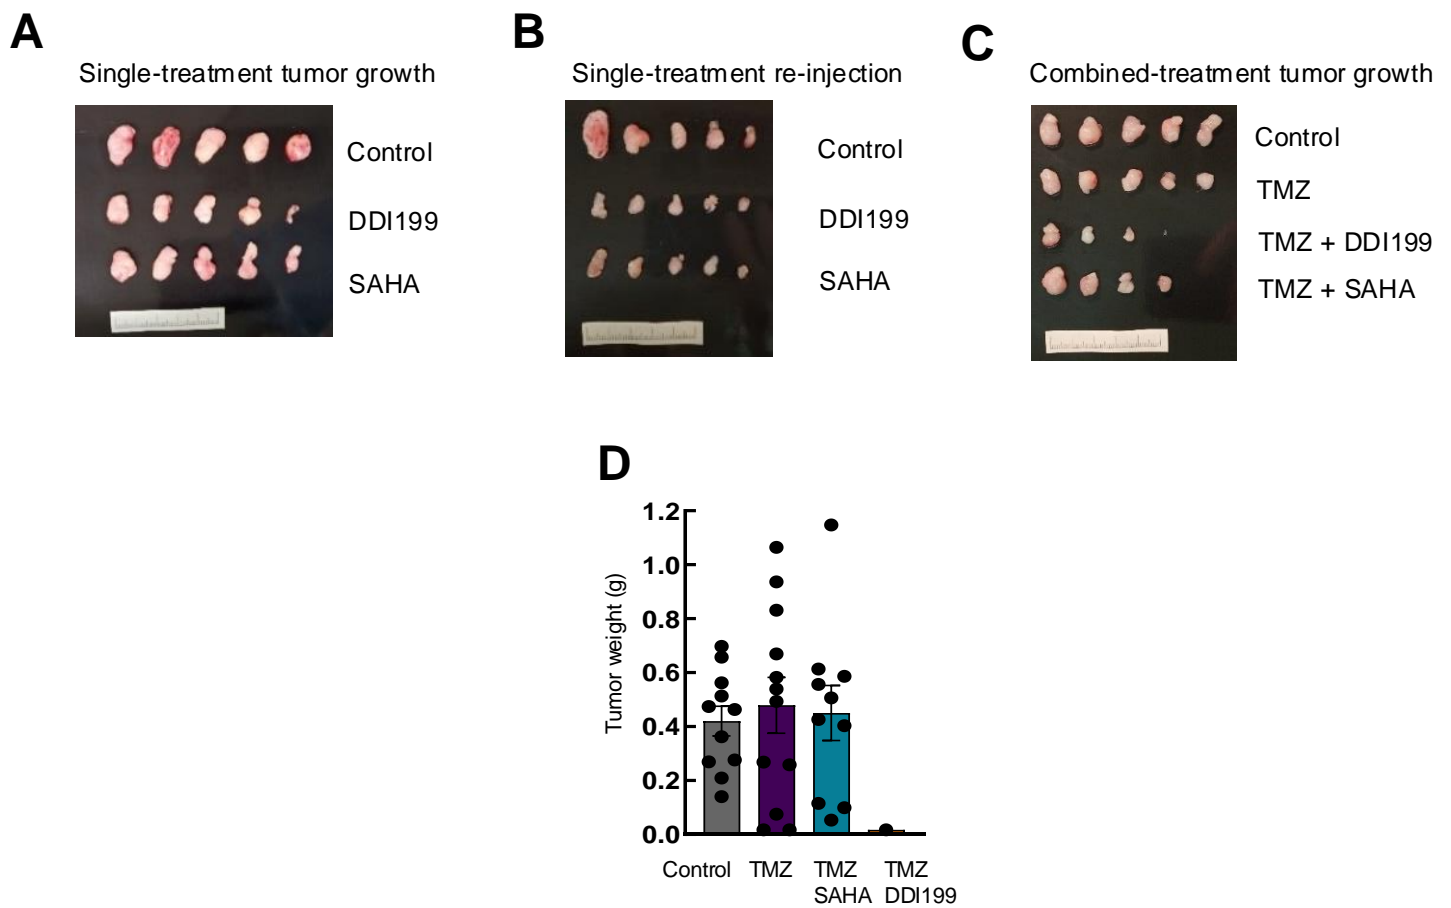

**Suppl. Fig. 7** **A)** Representative images of subcutaneous tumors from single-treatment tumor growth experiment. **B)** Representative images of subcutaneous tumors from single-treatment re-injection experiment. **C)** Representative images of subcutaneous tumors from combined-treatment tumor growth experiment. **D)** Tumor weight at end-point day 36 of combined-treatment re-injection experiment.
